# Supplementary material
Source: publisher site journal article supplement (https://www.dovepress.com/article/254141)
Supplement: Supplementary file 1 [file get_supplementary_file.php]

M 1 2 3 4 5 6 7 M

kDa

~170

~130

~100

~70

~55

~40

~35

~25

~15

~10

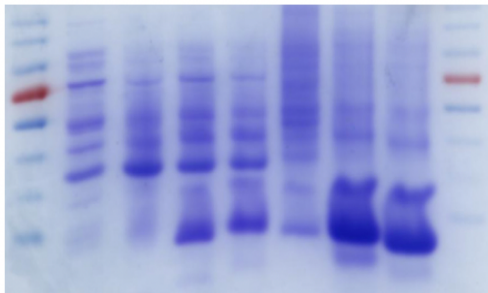

**Figure S1** SDS-PAGE result of the hypothetical protein anthp1 expression in BL21 strains

M: marker

Lane 1: Pre-induction sample (supernatant)

Lane 2: uninduced sample (supernatant)

Lane 3: Induction sample (supernatant)

Lane 4: Induction sample (supernatant)

Lane 5: not induced sample (inclusionbody)

Lane 6: Induced Sample (Inclusionbody)

Lane 7: Induced Sample (Inclusionbody)

As shown in the figure, after the strain was induced with 1mM IPTG(Isopropyl- $\beta$ -D-thiogalactopyranoside), significant protein expression was observed around 25 kDa, which was comparable to the target protein. Uninduced strains did not express the protein.
